# Supplementary material for: Antimicrobial properties, cytotoxicity, colour and mechanical behavior of light-cured resin composites containing modified Novaron
Source: PeerJ journal article supplement (doi:10.7717/peerj-matsci.19), 2022-02-04
Supplement: _Colour_change_measurement.xls [file _Colour_change_measurement.xls]

## Sheet: clour change measurement
	Control groups	L*	a*	b*
		87.86	-0.66	1.09
		87.84	-0.74	1.45
		88.9	-0.75	1.08
		88.84	-0.83	0.93
		88.01	-0.79	1.11
		87.99	-0.81	1.09
SD		0.493031	0.6121	0.17225
Shapiro-Wilk W test P Value		0.02267	0.63478	0.09672
	Novaron groups	89.48	-0.81	1.18
		89.23	-0.81	1.22
		88.61	-0.9	0.8
		88.88	-0.89	0.79
		89.74	-0.76	1.15
		89.7	-0.68	1.48
SD		0.45588	0.0823205	0.265983
Shapiro-Wilk W test P Value		0.51971	0.7376	0.37323
	Control groups	87.87	-0.79	1.11
		87.84	-0.81	1.09
		87.7	-0.78	1.11
		88.9	-0.76	1.19
		88.84	-0.66	1.09
		88.9	-0.74	1.45
SD		0.592905	0.0531664	0.140523
Shapiro-Wilk W test P Value		0.21059	0.32589	0.00514
	Novaron groups	89.74	-0.81	1.18
		89.7	-0.8	1.22
		89.7	-0.82	1.22
		89.67	-0.9	0.8
		89.48	-0.89	0.79
		89.23	-0.91	0.81
SD		0.197349	0.0500999	0.223308
Shapiro-Wilk W test P Value		0.05347	0.11121	0.19474
	Control groups	88.96	-0.74	1.5
		88.01	-0.75	1.08
		87.99	-0.83	0.93
		87.81	-0.82	0.86
		88.23	-0.79	0.98
		88.12	-0.81	1.02
SD		0.404013	0.0374166	0.227545
Shapiro-Wilk W test P Value		0.08289	0.36199	0.06819
	Novaron groups	89.5	-0.91	0.79
		88.61	-0.76	1.15
		88.88	-0.68	1.48
		88.92	-0.76	1.28
		89.1	-0.78	1.2
		88.27	-0.87	0.89
SD		0.41938	0.0833467	0.254355
Shapiro-Wilk W test P Value		0.98254	0.46906	0.82704
