# Supplementary material for: Antimicrobial properties, cytotoxicity, colour and mechanical behavior of light-cured resin composites containing modified Novaron
Source: PeerJ journal article supplement (doi:10.7717/peerj-matsci.19), 2022-02-04
Supplement: _Cytotoxicity_mtt.xls [file _Cytotoxicity_mtt.xls]

## Sheet: Cytotoxicity MTT
	non-Novaron50%	Novaron50%	non-Novaron100%	Novaron100%	Negative	Positive
	0.209	0.253	0.247	0.306	0.212	0.048
	0.237	0.287	0.223	0.287	0.229	0.047
	0.214	0.353	0.253	0.269	0.287	0.047
	0.292	0.322	0.3	0.295	0.303	0.05
	0.272	0.282	0.274	0.288	0.215	0.047
	0.231	0.266	0.211	0.34	0.237	0.05
SD	0.0329166	0.0372098	0.0326599	0.0240728	0.0384937	0.001472
Shapiro-Wilk W test P Value	0.43029	0.62001	0.91753	0.49816	0.16191	0.65137
	0.257	0.279	0.235	0.351	0.205	0.046
	0.278	0.342	0.302	0.285	0.238	0.051
	0.236	0.28	0.261	0.332	0.301	0.046
	0.269	0.263	0.277	0.279	0.267	0.047
	0.208	0.264	0.228	0.294	0.275	0.05
	0.298	0.301	0.31	0.265	0.226	0.048
SD	0.0319541	0.297686	0.338669	0.333047	0.353157	0.0020976
Shapiro-Wilk W test P Value	0.94918	0.14946	0.56317	0.4241	0.93354	0.33104
	0.23	0.273	0.229	0.342	0.226	0.047
	0.257	0.253	0.275	0.286	0.245	0.049
	0.218	0.296	0.286	0.275	0.235	0.051
	0.287	0.305	0.217	0.32	0.278	0.048
	0.265	0.339	0.296	0.264	0.304	0.052
	0.238	0.285	0.302	0.291	0.252	0.052
SD	0.0253252	0.0294103	0.0358706	0.029262	0.0292005	0.002137
Shapiro-Wilk W test P Value	0.9136	0.9713	0.19302	0.60883	0.55142	0.86653
