# Supplementary material for: Antimicrobial properties, cytotoxicity, colour and mechanical behavior of light-cured resin composites containing modified Novaron
Source: PeerJ journal article supplement (doi:10.7717/peerj-matsci.19), 2022-02-04
Supplement: CFU_assay.xls [file CFU_assay.xls]

## Sheet:  S. mutans
	Novaron Group(s)	Non-Novaron Group(s)	Novaron Group(f)	Non-Novaron Group(f)
	56	123	173	170
	62	144	164	159
	66	112	157	169
	50	137	162	148
	73	128	142	153
	69	140	165	147
SD	8.52447	11.9944	10.4451	10.1127
Shapiro-Wilk W test P Value	0.9043	0.74039	0.4775	0.26915
	Novaron Group(s)	Non-Novaron Group(s)	Novaron Group(f)	Non-Novaron Group(f)
	45	104	138	117
	56	107	145	129
	43	137	132	140
	39	121	126	132
	52	105	140	126
	49	115	110	134
SD	6.21825	12.6873	12.5605	7.81452
Shapiro-Wilk W test P Value	0.97878	0.21444	0.51733	0.95191
	Novaron Group(s)	Non-Novaron Group(s)	Novaron Group(f)	Non-Novaron Group(f)
	88	189	238	228
	92	175	247	254
	97	190	231	236
	84	168	227	239
	79	170	253	241
	91	183	235	228
SD	6.34823	9.53764	9.83362	9.68848
Shapiro-Wilk W test P Value	0.97124	0.34959	0.77	0.41151

## Sheet: F. nucleatum
	Novaron Group(s)	Non-Novaron Group(s)	Novaron Group(f)	Non-Novaron Group(f)
	57	104	124	126
	59	105	135	115
	61	111	127	133
	64	108	132	132
	49	110	128	127
	52	98	119	125
SD	5.62139	4.77493	5.68331	6.43946
Shapiro-Wilk W test P Value	0.85688	0.59562	0.97856	0.34857
	Novaron Group(s)	Non-Novaron Group(s)	Novaron Group(f)	Non-Novaron Group(f)
	87	136	158	157
	69	135	169	165
	78	116	156	148
	86	122	164	152
	69	132	157	160
	74	125	147	159
SD	7.9854	7.9666	7.50333	6.04704
Shapiro-Wilk W test P Value	0.25656	0.53696	0.85525	0.92523
	Novaron Group(s)	Non-Novaron Group(s)	Novaron Group(f)	Non-Novaron Group(f)
	45	84	122	111
	43	85	115	109
	48	86	126	119
	39	79	109	116
	52	88	116	123
	44	98	104	105
SD	4.44597	6.31401	8.09115	6.70572
Shapiro-Wilk W test P Value	0.95999	0.40128	0.93559	0.93635

## Sheet: C. albicans
	Novaron Group(s)	Non-Novaron Group(s)	Novaron Group(f)	Non-Novaron Group(f)
	10	20	64	66
	9	25	57	68
	11	23	71	72
	8	19	67	54
	13	17	59	65
	12	24	70	59
SD	1.87083	3.14113	5.75036	6.48074
Shapiro-Wilk W test P Value	0.96055	0.6643	0.52827	0.8088
	Novaron Group(s)	Non-Novaron Group(s)	Novaron Group(f)	Non-Novaron Group(f)
	7	23	77	63
	8	26	69	74
	12	24	64	72
	11	19	78	65
	10	17	65	59
	9	22	61	63
SD	1.87083	3.3116	7.07107	5.79655
Shapiro-Wilk W test P Value	0.96055	0.86567	0.32854	0.51609
	Novaron Group(s)	Non-Novaron Group(s)	Novaron Group(f)	Non-Novaron Group(f)
	11	24	72	65
	13	22	68	71
	9	18	57	73
	12	30	61	71
	10	31	74	67
	11	26	59	64
SD	1.41421	4.91596	7.13909	3.67423
Shapiro-Wilk W test P Value	0.99952	0.83405	0.41275	0.25098
